# Supplementary material
Source: PubMed Central journal article supplement (PMC6386681)
Supplement: pnas.1817621116.sapp.pdf [file pnas.1817621116.sapp.pdf]

## Supplementary Information

A Comparative Transcriptomics Method to Infer Gene Coexpression Networks and its applications to Maize and Rice Leaf Transcriptomes

Chang et al.

## Supplementary figures and tables

|                         |                                                                                                                                                                                       |
|-------------------------|---------------------------------------------------------------------------------------------------------------------------------------------------------------------------------------|
| Supplementary Figure S1 | Time series of maize seed germination and seedling development                                                                                                                        |
| Supplementary Figure S2 | Examples of gene expression profiles over the time-series transcriptomes under two conditions                                                                                         |
| Supplementary Figure S3 | The distributions of PCC values between TF genes over the time-series RPKM values under LD and under TD                                                                               |
| Supplementary Figure S4 | TF-TF gene coexpression networks with LD+TD+ coexpression relationships                                                                                                               |
| Supplementary Figure S5 | The predicted TFBSs of four upstream regulators of <i>ZmSHR1</i>                                                                                                                      |
| Supplementary Figure S6 | EMSA validation of predicted upstream regulators of the C <sub>4</sub> enzyme genes                                                                                                   |
| Supplementary Figure S7 | Expression profiles of four TF genes in maize foliar (C <sub>4</sub> ) and husk (C <sub>3</sub> -type) embryonic leaves.                                                              |
| Supplementary Table S1  | Read count statistics of the RNA sequencing data for the 12 time points under total darkness (TD). The data were obtained using Illumina HiSeq2000 with the paired-end 2*101nt format |
| Supplementary Table S2  | Numbers of genes and TF-gene pairs in eight expression correlation types under LD and TD growth conditions                                                                            |
| Supplementary Table S3  | First to fourth order upstream TF candidates of <i>ZmSHR1</i>                                                                                                                         |
| Supplementary Table S4  | Sequences of gene cloning primers for protoplast transient assay (PTA)                                                                                                                |
| Supplementary Table S5  | Statistics of level order changes with different initial seeds                                                                                                                        |
| Supplementary Table S6  | Sequences of qRT-PCR primers                                                                                                                                                          |
| Supplementary Table S7  | EMSA primer sequences for regulator-target pairs in the upstream regulatory pathway of <i>ZmSHR1</i>                                                                                  |
| Supplementary Table S8  | Predicted TFBSs with cross-species conservation                                                                                                                                       |
| Supplementary Table S9  | Sequences of the cloning primers for predicted regulator genes of C <sub>4</sub> enzyme genes                                                                                         |
| Supplementary Table S10 | EMSA primer sequences for TF genes and their target C <sub>4</sub> enzyme genes                                                                                                       |

## Supplementary figures

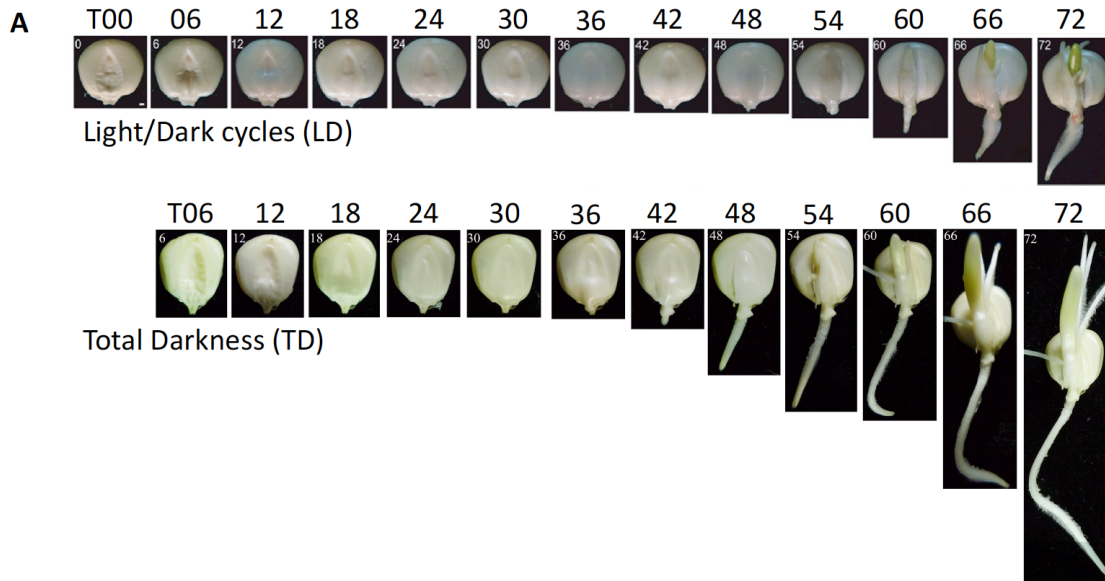

**B**

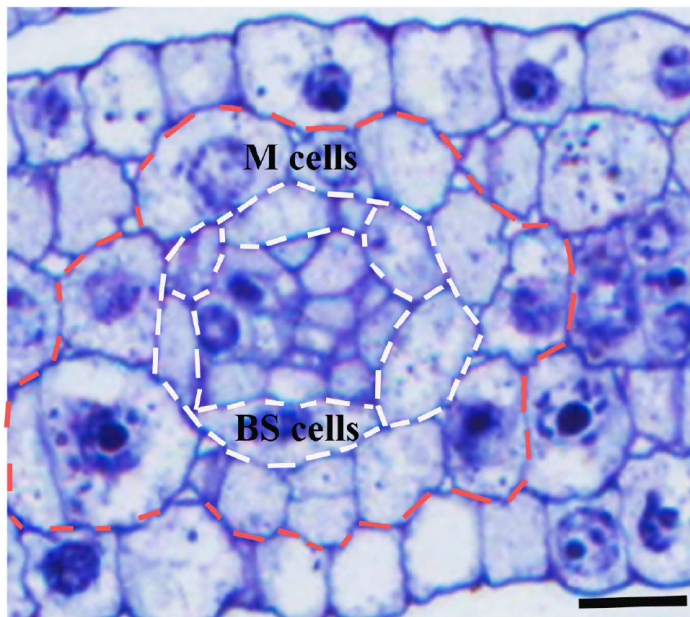

**Supplementary Figure S1.** Time series of maize seed germination and seedling development. (A) Morphologies of seed and germinating seedling from 0 h (T00, dry seed) to 72 h (T72) post imbibition under the natural light/dark (LD) cycle or under total darkness (TD). Scale bars: 1 mm. (B) Cross section of a second order vein under total darkness at 72 h (T72). The Kranz anatomy is shown with one layer of bundle sheath (BS) cells and one layer of mesophyll (M) cells. Scale bar: 10  $\mu$ m.

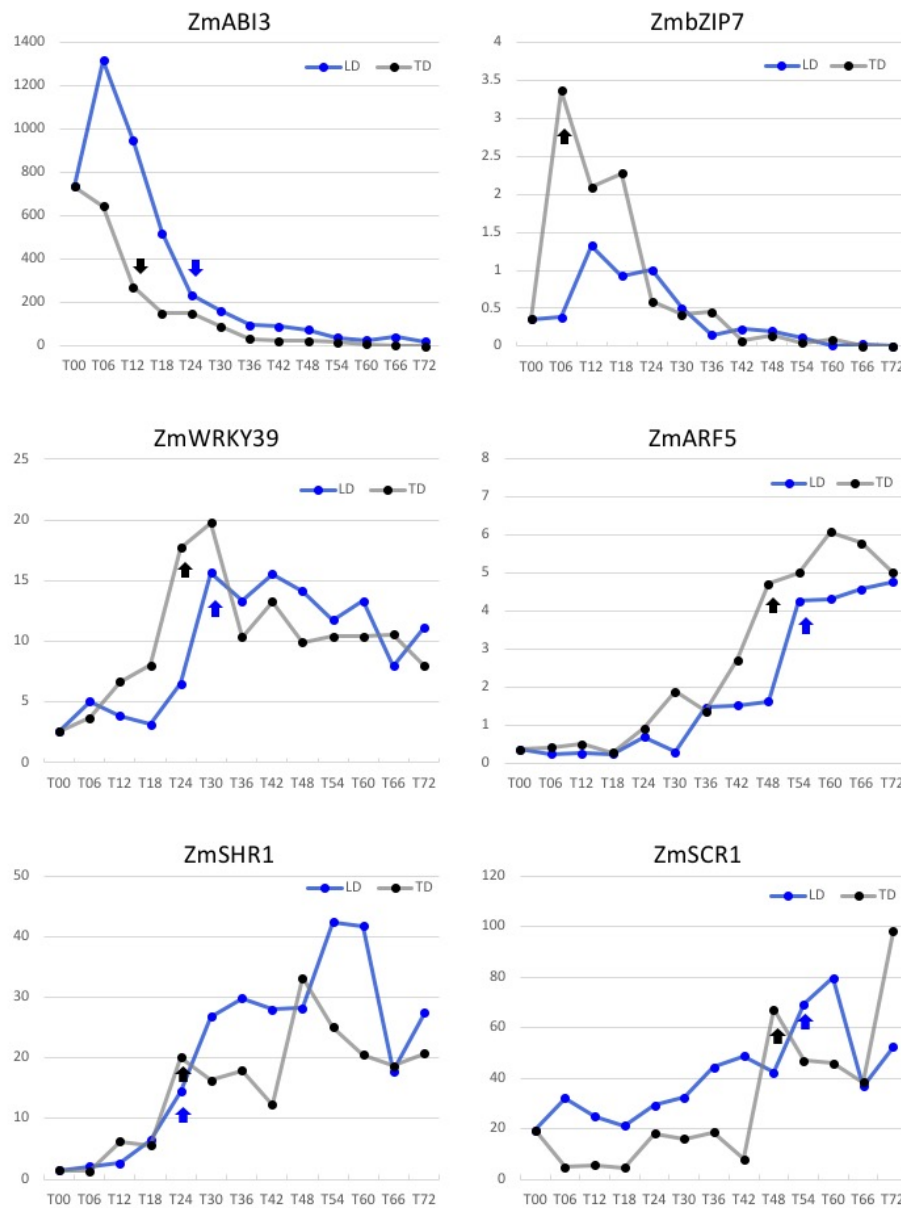

**Supplementary Figure S2.** Examples of gene expression profiles over the time-series transcriptomes under two conditions. Six gene expression profiles are shown over the time course from T00 to T72 (x-axis) under LD (blue line) and under TD (black line); the six TFs are *ZmABI3*, *ZmbZIP7*, *ZmWRKY39*, *ZmARF5*, *ZmSHR1*, and *ZmSCR1*. The up- and down-regulated time points of a gene are indicated by arrows (blue for LD and black for TD).

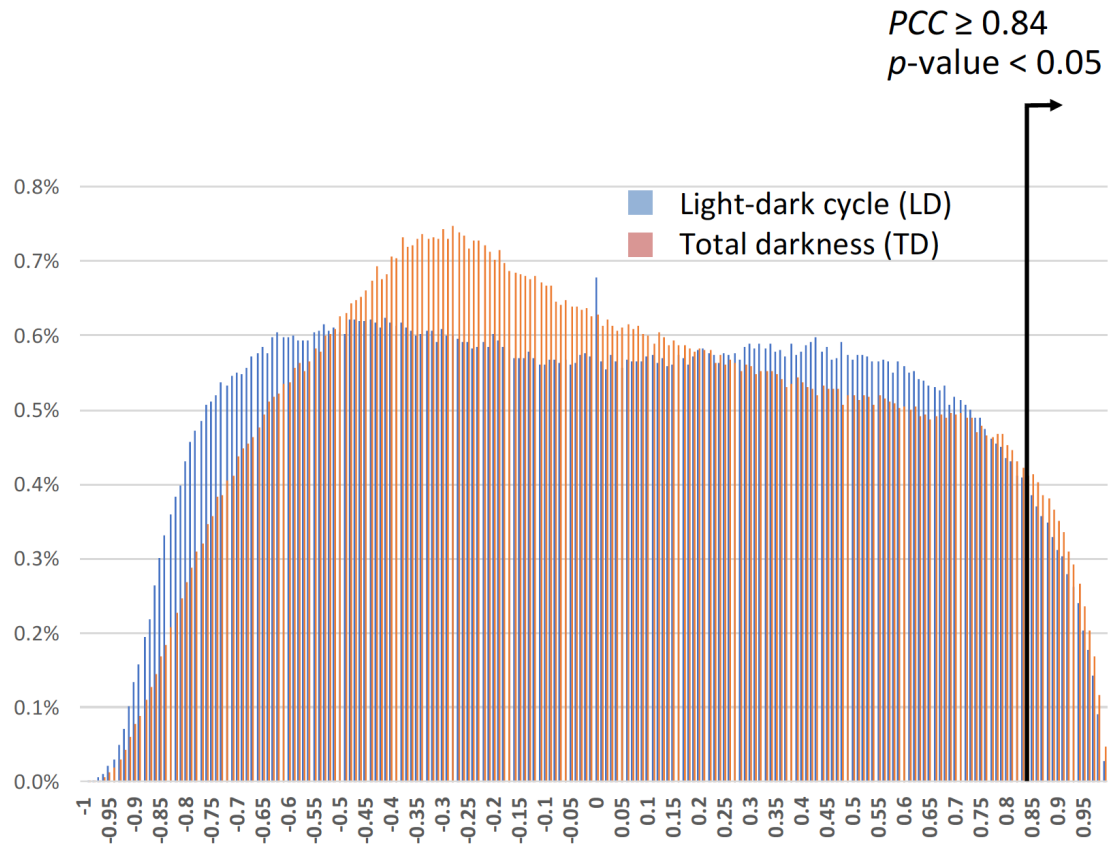

**Supplementary Figure S3.** The distributions of PCC values between TF genes over the time-series RPKM values under LD (blue bars) and under TD (red bars). The cutoff is set to 0.84 with  $p < 0.05$ .

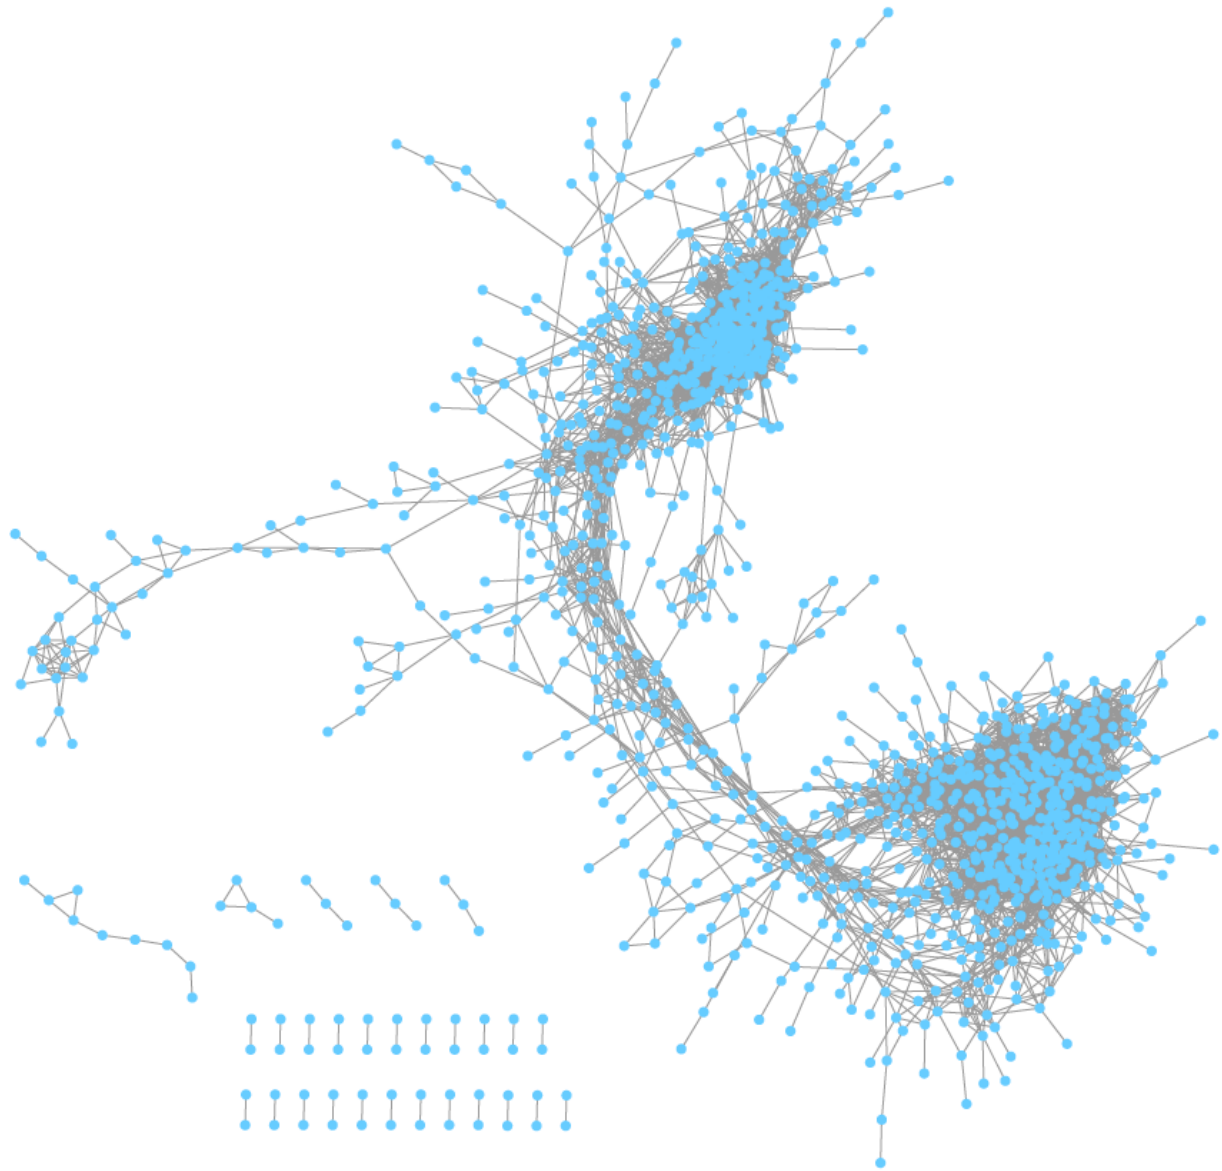

**Supplementary Figure S4.** TF-TF gene coexpression networks with LD+TD+ coexpression relationships (1,275 nodes and 16,281 edges). Each blue node and grey edge in the GCNs represent a TF gene and a coexpression relationship, respectively. The GCNs are visualized using the Cytoscape tool (<http://cytoscape.org>).

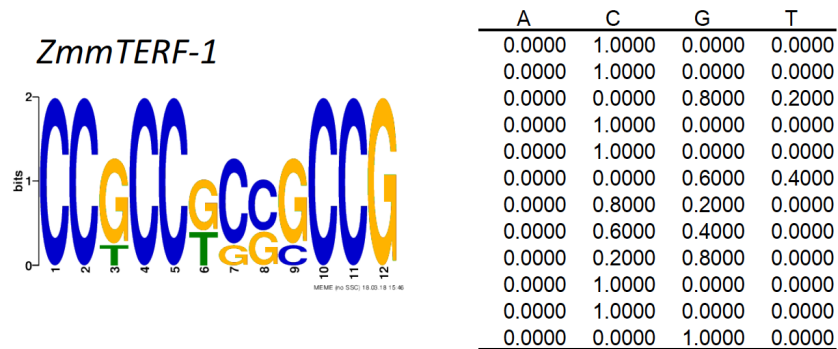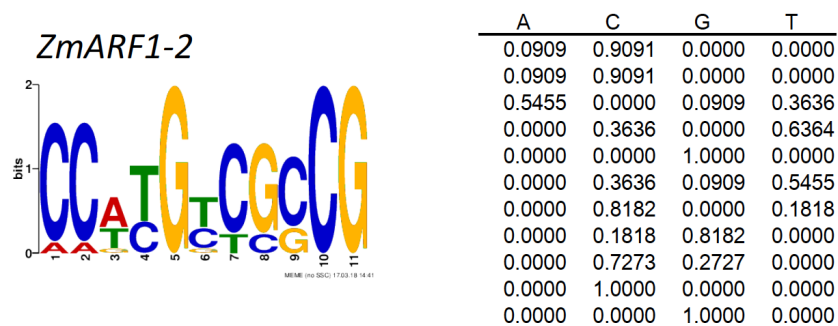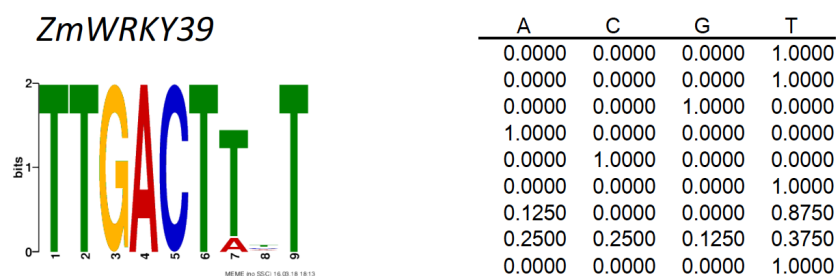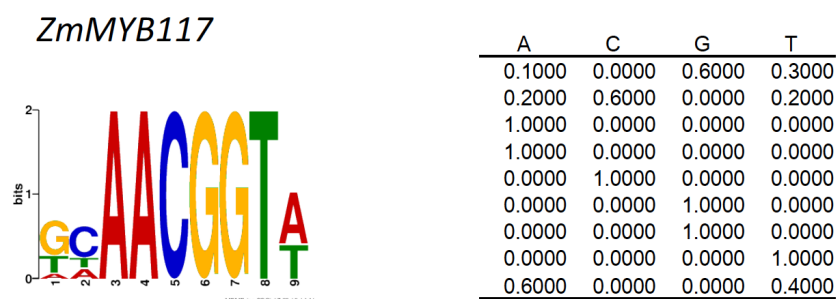

**Supplementary Figure S5.** The predicted TFBSs of four upstream regulators of *ZmSHR1*. The four regulators are *ZmmTERF-1*, *ZmARF1-2*, *ZmWRKY39*, and *ZmMYB117* and in each case the motif logo and position weight matrix are shown in the left and right hand panel, respectively.

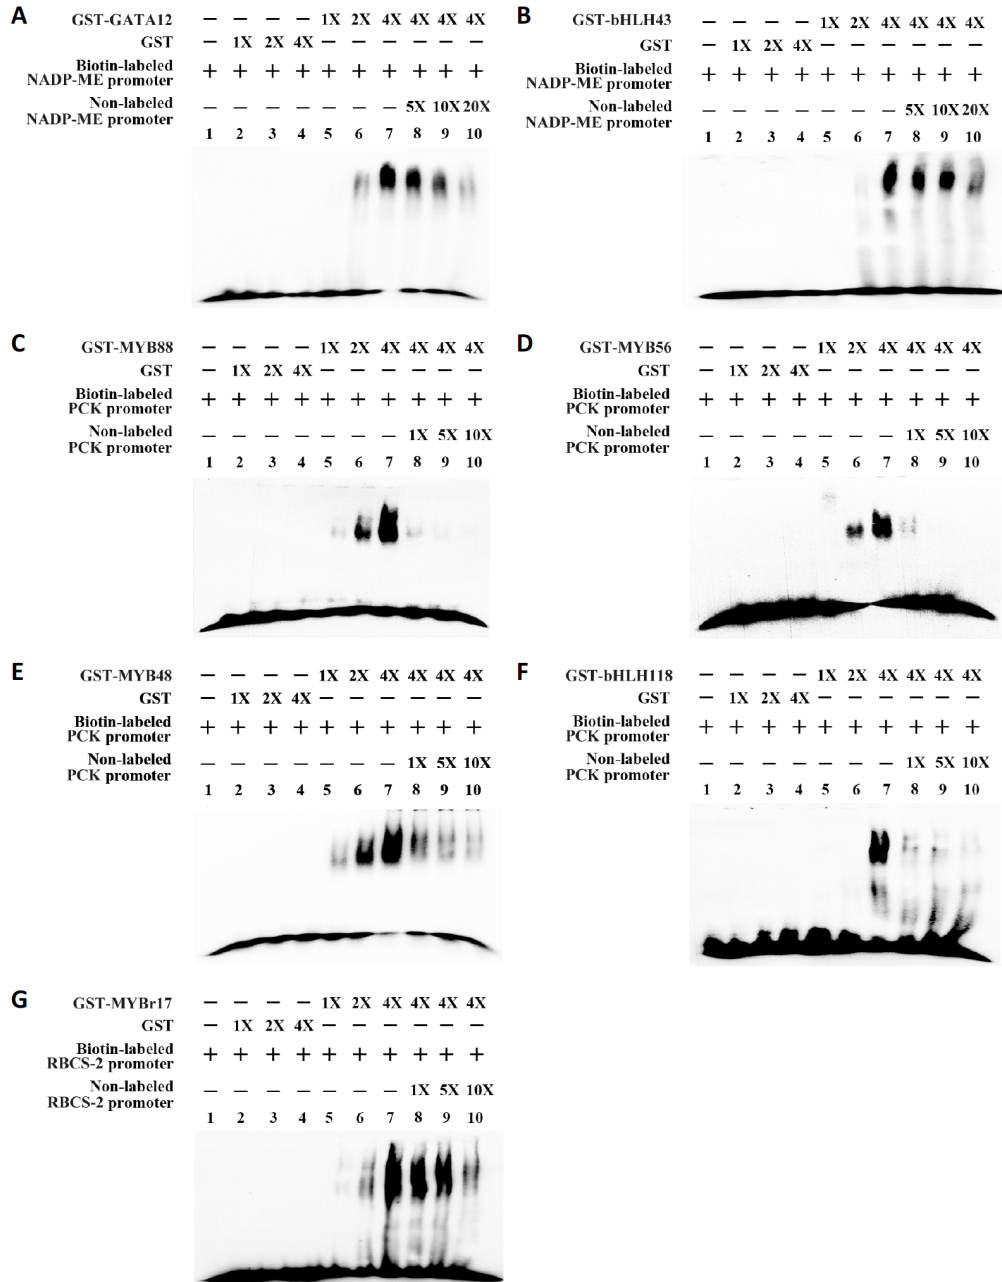

**Supplementary Figure S6.** EMSA validation of predicted upstream regulators of the  $C_4$  enzyme genes. The regulators tested were ZmGATA12, ZmbHLH43, ZmMYB88, ZmMYB56, ZmMYB48, ZmbHLH118, and ZmMYBr17. GST- ZmGATA12 (A), GST- ZmbHLH43 (B), GST- ZmMYB88 (C), GST- ZmMYB56 (D) and GST- ZmMYB48 (E), GST- ZmbHLH118 (F), GST- ZmMYBr17 (G), were isolated from *E. coli* and were separately incubated with probes corresponding to the predicted TF binding site in the *ZmNADP-ME* (A and B), *ZmPCK* (C-F), and *ZmRbcS2* (G) promoters, respectively. In each case EMSA was conducted with the biotin-labeled probe alone (lane 1), with increasing amounts of purified GST (lanes 2-4) or with GST-TF (lanes 5-7) and the biotin-labeled probe. The DNA-binding specificity of a TF was tested by adding excess of the unlabeled probe (lanes 8-10).

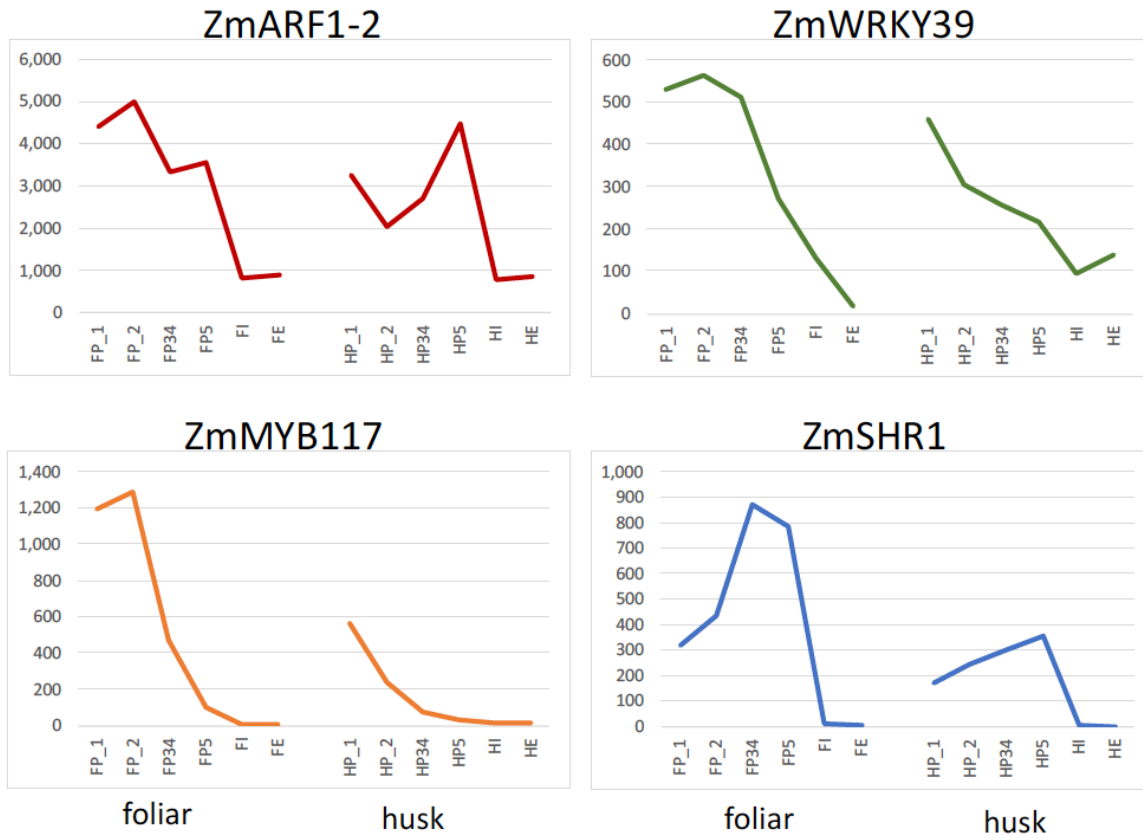

**Supplementary Figure S7.** Expression profiles of four TF genes in maize foliar (C<sub>4</sub>) and husk (C<sub>3</sub>-type) embryonic leaves. The analysis used the data from Wang et al. (1).



## Supplementary tables

**Supplementary Table S1.** Read count statistics of the RNA sequencing data for the 12 time points under total darkness (TD). The data were obtained using Illumina HiSeq2000 with the paired-end 2\*101nt format.

| Sample (TD) | Quality filtering |          | Mappable reads |          |
|-------------|-------------------|----------|----------------|----------|
|             | Total reads       | Rate (%) | Total reads    | Rate (%) |
| T06         | 622,278,182       | 92.8     | 502,136,866    | 80.7     |
| T12         | 631,190,482       | 92.9     | 529,141,296    | 83.8     |
| T18         | 654,440,380       | 92.6     | 550,918,931    | 84.2     |
| T24         | 507,710,021       | 94.3     | 422,194,745    | 83.2     |
| T30         | 564,950,902       | 91.6     | 477,864,256    | 84.6     |
| T36         | 520,170,828       | 94.0     | 441,941,333    | 85.0     |
| T42         | 589,910,974       | 92.7     | 499,591,439    | 84.7     |
| T48         | 441,648,581       | 95.1     | 370,185,791    | 83.8     |
| T54         | 478,353,359       | 95.0     | 403,373,361    | 84.3     |
| T60         | 619,109,440       | 93.0     | 524,564,651    | 84.7     |
| T66         | 594,676,837       | 93.7     | 500,542,333    | 84.2     |
| T72         | 732,667,006       | 91.9     | 621,034,074    | 84.8     |

**Supplementary Table S2.** Numbers of genes and TF-gene pairs in eight expression correlation types under LD and TD growth conditions.

|                        | Coexpression type |          |          |          |          |          |        |        |
|------------------------|-------------------|----------|----------|----------|----------|----------|--------|--------|
|                        | LD+TD+            | LD+TD0   | LD0TD+   | LD0TD-   | LD-TD0   | LD-TD-   | LD+TD- | LD-TD+ |
| <b># genes</b>         | 17,457            | 22,227   | 22,645   | 23,096   | 22,460   | 15,874   | 294    | 1,384  |
| <b>(# TF genes)</b>    | (1,538)           | (1,698)  | (1,702)  | (1,703)  | (1,654)  | (1,398)  | (102)  | (329)  |
| <b># TF-gene pairs</b> | 431,974           | 547,762  | 671,020  | 546,822  | 704,620  | 539,624  | 239    | 3,710  |
| <b>(#TF-TF pairs)</b>  | (16,281)          | (18,984) | (25,907) | (14,394) | (29,727) | (15,951) | (9)    | (160)  |

Note that the coexpression type of LD0TD0 means no coexpression under both conditions, so we exclude it in this study.

**Supplementary Table S3.** First to fourth order upstream TF candidates of *ZmSHR1*.

| Gene ID AGPv4  | TF family       | TO-GCN level | Order of candidate | Gene name      | TFBS ID                         |
|----------------|-----------------|--------------|--------------------|----------------|---------------------------------|
| Zm00001d043969 | GATA            | 11           | 1st                | <i>GATA20</i>  | C2C2gata_tnt.GATA19_colamp_a_m1 |
| Zm00001d020037 | C2H2            | 11           | 1st                | <i>DOT5</i>    | C2H2_tnt.WIP5_colamp_a_m1       |
| Zm00001d012731 | ARF             | 11           | 1st                | <i>ARF3-2</i>  | ETT_TGTCGGAA                    |
| Zm00001d037117 | GRF             | 11           | 1st                | <i>GRF5</i>    | GRF_tnt.AtGRF6_col_a_m1         |
| Zm00001d022295 | HSF             | 11           | 1st                | <i>HSFB4</i>   | HSF_tnt.HSFB4_col_a_m1          |
| Zm00001d049443 | HD-ZIP          | 11           | 1st                | <i>ML1</i>     | M0852_1.02                      |
| Zm00001d034204 | AP2             | 11           | 1st                | <i>ANT1</i>    | M2364_1.02                      |
| Zm00001d052256 | TCP             | 11           | 1st                | <i>TCP14</i>   | MA1063.1                        |
| Zm00001d025669 | WRKY            | 11           | 1st                | <i>WRKY2</i>   | MA1078.1                        |
| Zm00001d048493 | NAC             | 11           | 1st                | <i>NAC086</i>  | NAC_tnt.ANAC028_col_a_m1        |
| Zm00001d031463 | NAC             | 11           | 1st                | <i>CUC3</i>    | NAC_tnt.CUC3_col_a_m1           |
| Zm00001d022613 | bZIP            | 11           | 1st                | <i>FD</i>      | pTH7315_AREB2_AT3G19290         |
| Zm00001d002075 | AP2             | 11           | 1st                | <i>AP2</i>     | TOE1_CCTCGTAC                   |
| Zm00001d002829 | YABBY           | 11           | 1st                | <i>YAB3</i>    | <b>unknown</b>                  |
| Zm00001d004889 | WOX             | 11           | 1st                | <i>WOX3</i>    | <b>unknown</b>                  |
| Zm00001d017784 | ZF-HD           | 11           | 1st                | <i>ZFHD5</i>   | <b>unknown</b>                  |
| Zm00001d025944 | YABBY           | 11           | 1st                | <i>YAB1</i>    | <b>unknown</b>                  |
| Zm00001d027991 | HD-ZIP          | 11           | 1st                | <i>HB6</i>     | <b>unknown</b>                  |
| Zm00001d028371 | C2H2            | 11           | 1st                | <i>ZFP4</i>    | <b>unknown</b>                  |
| Zm00001d036356 | MYB-related     | 11           | 1st                | <i>SANT1</i>   | <b>unknown</b>                  |
| Zm00001d040186 | bHLH            | 11           | 1st                | <i>bHLH110</i> | <b>unknown</b>                  |
| Zm00001d042588 | ERF             | 11           | 1st                | <i>CRF3</i>    | <b>unknown</b>                  |
| Zm00001d048309 | bHLH            | 11           | 1st                | <i>bHLH</i>    | <b>unknown</b>                  |
| Zm00001d051471 | B3              | 11           | 1st                | <i>NGA2-3</i>  | <b>unknown</b>                  |
| Zm00001d002794 | WRKY            | 11           | 1st                | <i>WRKY12</i>  | WRKY12_CGTTGACC                 |
| Zm00001d002562 | B3              | 10           | 1st                | <i>NGA2-1</i>  | ABI3VP1_tnt.NGA4_col_a_m1       |
| Zm00001d017618 | B3              | 10           | 1st                | <i>NGA2-2</i>  | ABI3VP1_tnt.NGA4_col_a_m1       |
| Zm00001d013699 | HD-ZIP          | 10           | 1st                | <i>HB14</i>    | HB_tnt.ATHB15_col_a_m1          |
| Zm00001d041489 | HD-ZIP          | 10           | 1st                | <i>PHB</i>     | M2366_1.02                      |
| Zm00001d032194 | MYB/MYB-related | 10           | 1st                | <i>MYB117</i>  | MYB_tnt.MYB105_col_a_m1         |
| Zm00001d014814 | bHLH            | 10           | 1st                | <i>bHLH93</i>  | <b>unknown</b>                  |
| Zm00001d020774 | ZF-HD           | 10           | 1st                | <i>ZHD1-2</i>  | ZFHD_tnt.ATHB25_col_a_m1        |
| Zm00001d015243 | ARF             | 10           | 2nd                | <i>ARF20</i>   | ARF_ecoli.MP_col_m1             |
| Zm00001d034163 | Dof             | 10           | 2nd                | <i>OBP2</i>    | Dof5.7_ACGTTAAC                 |
| Zm00001d039006 | ARF/B3          | 10           | 2nd                | <i>ARF3-1</i>  | ETT_TGTCGGAA                    |

|                |         |    |     |                 |                               |
|----------------|---------|----|-----|-----------------|-------------------------------|
| Zm00001d002005 | SBP     | 10 | 2nd | <i>SPL8</i>     | M2371_1.02                    |
| Zm00001d001879 | ARF     | 10 | 2nd | <i>ARF8</i>     | MA0944.1                      |
| Zm00001d012067 | bHLH    | 10 | 2nd | <i>bHLH62</i>   | pTH7309_AT1G68920_AT1G68920   |
| Zm00001d017350 | TCP     | 10 | 2nd | <i>TCP21</i>    | TCP_tnt.At5g08330_colamp_a_m1 |
| Zm00001d021236 | HD-ZIP  | 9  | 2nd | <i>ANL2</i>     | HB_tnt.ANL2_colamp_a_m1       |
| Zm00001d051527 | G2-like | 9  | 2nd | <i>KAN2-2</i>   | KAN1_CGAATAT.T                |
| Zm00001d030727 | Dof     | 9  | 2nd | <i>DOF5.1-1</i> | M2712_1.02                    |
| Zm00001d026590 | ARF     | 9  | 2nd | <i>ARF6</i>     | MA0944.1                      |
| Zm00001d041866 | TCP     | 9  | 2nd | <i>TCP8-2</i>   | MA1063.1                      |
| Zm00001d011953 | ARF     | 9  | 2nd | <i>ARF2-2</i>   | ARF_tnt.ARF2_col_v31_m1       |
| Zm00001d039439 | BES1    | 9  | 2nd | <i>BEH4</i>     | BZR_tnt.At4g18890_colamp_a_m1 |
| Zm00001d017702 | G2-like | 9  | 2nd | <i>KAN2-1</i>   | KAN1_CGAATAT.T                |
| Zm00001d039907 | RAV     | 9  | 2nd | <i>RAV1</i>     | M0013_1.02                    |
| Zm00001d006110 | bHLH    | 9  | 2nd | <i>bHLH137</i>  | M0166_1.02                    |
| Zm00001d041549 | Dof     | 9  | 2nd | <i>DOF5.1-2</i> | M2712_1.02                    |
| Zm00001d033965 | WRKY    | 9  | 2nd | <i>WRKY39-2</i> | WRKY_tnt.WRKY7_colamp_a_m1    |
| Zm00001d023565 | TCP     | 8  | 3rd | <i>TCP8-1</i>   | MA1063.1                      |
| Zm00001d049824 | SBP     | 8  | 3rd | <i>SPL13B-2</i> | SBP_tnt.SPL13_col_a_m1        |
| Zm00001d021285 | SRS     | 8  | 3rd | <i>SRS3</i>     | <b>unknown</b>                |
| Zm00001d013307 | WRKY    | 8  | 3rd | <i>WRKY39</i>   | WRKY_tnt.WRKY7_colamp_a_m1    |
| Zm00001d003601 | ARF     | 8  | 4th | <i>ARF1-2</i>   | ARF_tnt.ARF2_col_v31_m1       |
| Zm00001d038698 | ARF/B3  | 8  | 4th | <i>ETT-1</i>    | ETT_TGTCGGAA                  |
| Zm00001d015585 | mTERF   | 8  | 4th | <i>mTERF-2</i>  | <b>unknown</b>                |
| Zm00001d024468 | AP2/ERF | 8  | 4th | <i>AIL1</i>     | <b>unknown</b>                |
| Zm00001d038158 | mTERF   | 8  | 4th | <i>mTERF-3</i>  | <b>unknown</b>                |
| Zm00001d050781 | ARF     | 7  | 4th | <i>ARF1-1</i>   | MA0942.1                      |
| Zm00001d012015 | SBP     | 7  | 4th | <i>SPL13B-1</i> | SBP_tnt.SPL13_col_a_m1        |
| Zm00001d031533 | mTERF   | 7  | 4th | <i>mTERF-1</i>  | <b>unknown</b>                |
| Zm00001d005931 | ZF-HD   | 7  | 4th | <i>ZHD1-1</i>   | ZFHD_tnt.ATHB25_col_a_m1      |

**Supplementary Table S4.** Sequences of gene cloning primers for protoplast transient assay (PTA).

| Gene ID        | Level in the TO-GCN:<br>gene name | Forward primer                | Reverse primer                     |
|----------------|-----------------------------------|-------------------------------|------------------------------------|
| Zm00001d003601 | L8: ZmARF1-2                      | GAATTCATGGACGCGCC<br>CAACCCT  | GAGCTCTCATTGAGACA<br>GTGAGTTCGCAGC |
| Zm00001d013307 | L8: ZmWRKY39                      | GAATTCATGGAGGCGA<br>TGGAGGAGG | AAGCTTCAGGCTGGCTG<br>GGCTAGAA      |
| Zm00001d032194 | L10: ZmMYB117                     | GAATTCATGCCGTGCTC<br>GTCGCC   | AAGCTTTCATGTGGCTC<br>CGACCCC       |
| Control        | GFP                               | ATGGTGAGCAAGGGCG<br>AGGAG     | TACTTGACAGCTCGTC<br>CATGC          |

**Supplementary Table S5.** Statistics of level order changes with different initial seeds

| TF gene ID of<br>initial seed | TF family   | Gene name | Proportion of TFs<br>with level change | Mean of level<br>change <sup>a</sup> | STDEV of level<br>change |
|-------------------------------|-------------|-----------|----------------------------------------|--------------------------------------|--------------------------|
| Zm00001d013074                | bZIP        | ZmbZIP25  | 16%                                    | -0.06                                | 0.39                     |
| Zm00001d018941                | HSF         | ZmHSFA6B  | 10%                                    | -0.05                                | 0.32                     |
| Zm00001d040775                | GATA        | ZmGATA16  | 11%                                    | -0.11                                | 0.32                     |
| Zm00001d046974                | MYB_related | ZmRVE6    | 13%                                    | -0.12                                | 0.34                     |
| Zm00001d050242                | NF-YB       | ZmNF-YB12 | 8%                                     | -0.07                                | 0.28                     |
| Zm00001d013202                | G2-like     | ZmHHO5    | 17%                                    | -0.12                                | 0.39                     |
| Zm00001d030907                | B3          | ZmABI46   | 9%                                     | -0.09                                | 0.29                     |
| Zm00001d043992                | bZIP        | ZmGBF3    | 14%                                    | -0.06                                | 0.38                     |
| Zm00001d001837                | MYB         | ZmMYB133  | 13%                                    | -0.08                                | 0.34                     |
| Zm00001d031723                | bZIP        | ZmbZIP127 | 15%                                    | -0.12                                | 0.37                     |
| Zm00001d007339                | C2H2        |           | 10%                                    | 0.04                                 | 0.32                     |

<sup>a</sup> For each node, the positive and negative number represent its level changes to lower or higher level, respectively, in the new TO-GCN against the original one. Zero represents no change between two TO-GCN. For example, a node belongs to level 5 in the original TO-GCN and changes to level 4 in the new one then the level change number is -1.

**Supplementary Table S6.** Sequences of qRT-PCR primers.

| Gene ID        | Level in the TO-GCN:<br>gene name | Forward primer              | Reverse primer               |
|----------------|-----------------------------------|-----------------------------|------------------------------|
| Zm00001d021973 | L11: ZmSHR1                       | CCAACGCATCCTAC<br>AACTAC    | TGTTGCCGCATTCTTCTT           |
| Zm00001d032194 | L10: ZmMYB117                     | CCTTTGAAGGGACG<br>ACAAGA    | AAGCTTTCATGTGGCTC<br>CGACCCC |
| Zm00001d013307 | L8: ZmWRKY39                      | GAGATGGTTAAGAG<br>GAGCAATC  | ATGTCTGAGAGCCACTA<br>ACT     |
| Control        | GFP                               | AAGCAGCACGACTT<br>CTTC      | CACCTTGATGCCGTTCTT           |
| Control        | ZmACT                             | CTGAGGTTCTATTC<br>CAGCCATCC | CCACCACTGAGGACAAC<br>ATTACC  |

**Supplementary Table S7.** EMSA primer sequences for regulator-target pairs in the upstream regulatory pathway of *ZmSHR1*.

| TF<br>Level: Gene name | Target gene<br>Level in the TO-GCN:<br>Gene name | Probe                       |                             |
|------------------------|--------------------------------------------------|-----------------------------|-----------------------------|
|                        |                                                  | Forward primer              | Reverse primer              |
| L8: ZmARF1-2           | L8: ZmWRKY39                                     | ACGCTCGCTCGTCGT<br>CACCACCA | ATGGTGGTGACGACG<br>AGCGAGCG |
| L8: ZmWRKY39           | L10: ZmMYB117                                    | ATGGCCAGTCAAGC<br>GTTGCAGAG | ACTCTGCAACGCTTG<br>ACTGGCCA |
| L10: ZmMYB117          | L11: ZmSHR1                                      | AATCCGAACCATTC<br>CTTAG     | AACTAAGGAATGGTT<br>CGGA     |

**Supplementary Table S8.** Predicted TFBSs with cross-species conservation.

| Target C4 enzyme | Regulator gene name | Arabidopsis (DBD identity %) <sup>a</sup> | Motif ID                             | Conservation <sup>b</sup> |
|------------------|---------------------|-------------------------------------------|--------------------------------------|---------------------------|
| BS: ZmNADP-ME    | ZmGATA12            | AT5G49300 (70%)                           | C2C2gata_tnt.GATA16_col_a_m1         | 1                         |
| BS: ZmNADP-ME    | ZmbHLH43            | AT1G09530 (79%)                           | M2863_1.02                           | 3                         |
| BS: ZmNADP-ME    | ZmERF               | AT1G36060 (86%)                           | AP2EREBP_tnt.At1g36060_col_a_m1      | 4                         |
| BS: ZmNADP-ME    | ZmNAC               | AT5G18270 (73%)                           | NAC_tnt.ANAC087_col_v3_a_m1          | 2                         |
| BS: ZmPCK        | ZmMYB48             | AT5G59780 (86%)                           | MYB59_GTTAGGTA                       | 1                         |
| BS: ZmPCK        | ZmMYB88             | AT5G59780 (83%)                           | MYB59_GTTAGGTA                       | 1                         |
| BS: ZmPCK        | ZmMYB56             | AT5G59780 (86%)                           | MYB59_GTTAGGTA                       | 1                         |
| BS: ZmPCK        | ZmbHLH118           | AT5G54680 (71%)                           | M0167_1.02                           | 2                         |
| BS: ZmRbcS2      | ZmMYBr17            | AT5G47390 (82%)                           | MYBrelated_tnt.At5g47390_colamp_a_m1 | 3                         |
| M: ZmCA          | ZmABI33             | AT1G13260 (73%)                           | RAV_tnt.RAV1_colamp_a_m1             | 1                         |
| M: ZmCA          | ZmRAV               | AT1G13260 (77%)                           | RAV_tnt.RAV1_colamp_a_m1             | 1                         |
| M: ZmPEPC        | ZmRAV               | AT1G13260 (77%)                           | RAV_tnt.RAV1_colamp_a_m1             | 1                         |

<sup>a</sup> DNA-binding domain (DBD) sequence identity between a maize TF and its best homologous Arabidopsis TF

<sup>b</sup> Four reference species were used, including *Brachypodium distachyon*, *Oryza sativa*, *Sorghum bicolor*, and *Setaria italica*. The number refers to the number of species in which the TFBS was observed.

**Supplementary Table S9.** Sequences of the cloning primers for predicted regulator genes of C<sub>4</sub> enzyme genes.

| Regulator Gene ID | Clone ID | Regulator gene name | Forward cloning primer              | Reverse cloning primer              |
|-------------------|----------|---------------------|-------------------------------------|-------------------------------------|
| Zm00001d037605    | PUT6147  | ZmGATA12            | GAATTCATGATGATGG<br>ATTCCGCGGA      | AAGCTTCTAGCCATG<br>TAGCAGCGTGGATCT  |
| Zm00001d033267    | PUT4131  | ZmbHLH43            | GAATTCATGAACCAGTT<br>CGTGCCGGA      | AAGCTTTCATCTAAG<br>AGCGCCCATCTGCAG  |
| Zm00001d048623    | PUT5992  | ZmMYB88             | GAATTCATGGTGACTGT<br>GAGAGAGGAGATGC | AAGCTTCCCACCCTTT<br>CACATCATGATTTTC |
| Zm00001d030678    | PUT5678  | ZmMYB56             | GAATTCCTTCACCAT<br>GGTGACAGTGAG     | AAGCTTTCAGAAGCA<br>GGGCCAACTCCTTC   |
| Zm00001d038357    | PUT3433  | ZmbHLH118           | GAATTCCTTCACCATGAG<br>CTGCGCGGG     | CTCGAGACCCTTCTAG<br>GCGACCGGCGG     |
| Zm00001d044409    | PUT3161  | ZmMYBR17            | GAATTCATGGCTAGGA<br>AGTGCTCACACTGTG | AAGCTTTCATGTTCGG<br>ATGGATGGGGCA    |

**Supplementary Table S10.** EMSA primer sequences for TF genes and their target C<sub>4</sub> enzyme genes.

| TF gene name | Target gene name | Target gene ID | Forward EMSA primer           | Reverse EMSA primer           |
|--------------|------------------|----------------|-------------------------------|-------------------------------|
| ZmGATA12     | ZmNADP-ME        | Zm00001d000316 | ACATCATCACCAG<br>CAACATATAAAG | TATCTTTATATGTT<br>GCTGGTGATGA |
| ZmbHLH43     | ZmNADP-ME        | Zm00001d000316 | AACGTCACACGTG<br>AAAAGC       | AAGCTTTTCACGTG<br>TGACG       |
| ZmMYB88      | ZmPCK            | Zm00001d028471 | AAATGACCGAACA<br>TCAG         | AACTGATGTTCGGT<br>CAT         |
| ZmMYB56      | ZmPCK            | Zm00001d028471 | AAATGACCGAACA<br>TCAG         | AACTGATGTTCGGT<br>CAT         |
| ZmbHLH118    | ZmPCK            | Zm00001d028471 | AATAACACGTGAG<br>TAGGG        | AACCCTACTCACGT<br>GTTA        |
| ZmMYBR17     | ZmRbcS2          | Zm00001d004894 | AATCAGGATAGGC<br>CAGGC        | AAGCCTGGCCTATC<br>CTGA        |

1. Wang P, Kelly S, Fouracre JP, & Langdale JA (2013) Genome-wide transcript analysis of early maize leaf development reveals gene cohorts associated with the differentiation of C<sub>4</sub> Kranz anatomy. *Plant J* 75(4):656-670.
